# Supplementary material
Source: PubMed Central journal article supplement (PMC4727824)

Lethal irradiation

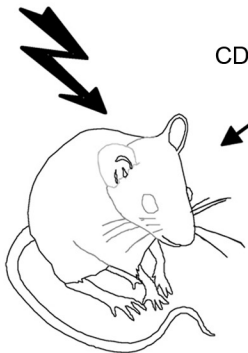

CD45.1 bone marrow

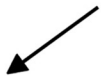

CD45.2 recipient mice

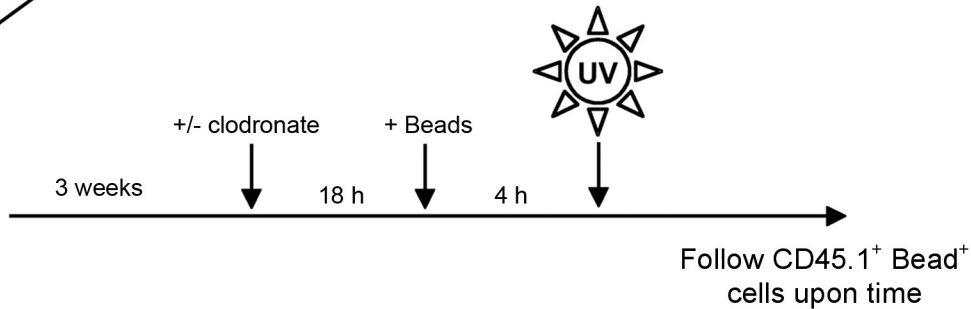

**MERAD, SUPP DATA 1**

Supplement: NIHMS750931-supplement-Supplemental.pdf [file NIHMS750931-supplement-Supplemental.pdf]
